# Supplementary material
Source: MDPI journal article supplement (https://www.mdpi.com/2071-1050/15/1/386)
Supplement: s1 [file s1]

## **Supporting Information**

### **Spatio-temporal distribution and risk assessment of antibiotics in the aquatic environment in China nationwide**

**Nan Li <sup>1,2,\*</sup>, Yongxin Cai <sup>1,2</sup>, Hanling Chen <sup>1,2</sup>, Junjie Huang<sup>1,2</sup>, Zhihao Hou<sup>1,2</sup> and Qi Li <sup>1,2</sup>**

<sup>1</sup> College of Urban and Environmental Sciences, Northwest University, Xi'an 710127, China

<sup>2</sup> Shaanxi Key Laboratory of Earth Surface System and Environmental Carrying Capacity, College of Urban and Environmental Sciences, Northwest University, Xi'an 710127, China

\* Correspondence Author: [linan0365@nwu.edu.cn](mailto:linan0365@nwu.edu.cn)

#### **Contents:**

#### **Tables:**

Table S1 Physico-chemical properties of antibiotics investigated in this study

Table S2 Abbreviation and full name index

Table S3 Risk quotients of antibiotics in seawater of China

Table S4 Risk quotients of antibiotics in surface water of China

Table S1 Physico-chemical properties of antibiotics investigated in this study

| Class        | Compound         | Abbreviation | CAS NO.    | Molecular formula                                                            | Molecular weight | logK <sub>ow</sub> | pK <sub>a</sub> |
|--------------|------------------|--------------|------------|------------------------------------------------------------------------------|------------------|--------------------|-----------------|
| β-lactams    | Penicillin V     | PENV         | 87-08-1    | C <sub>16</sub> H <sub>18</sub> N <sub>2</sub> O <sub>5</sub> S              | 350.389          | 1.88 <sup>a</sup>  | 2.73            |
|              | Penicillin G     | PENG         | 61-33-6    | C <sub>16</sub> H <sub>18</sub> N <sub>2</sub> O <sub>4</sub> S              | 334.390          | 1.83 <sup>b</sup>  | 2.74            |
|              | Cephalexin       | CLX          | 15686-71-2 | C <sub>16</sub> H <sub>17</sub> N <sub>3</sub> O <sub>4</sub> S              | 347.389          | 0.65               | 5.20            |
|              | Cefradine        | CRD          | 38821-53-3 | C <sub>16</sub> H <sub>19</sub> N <sub>3</sub> O <sub>4</sub> S              | 349.405          | 0.98               | 2.60            |
|              | Amoxicillin      | AMOX         | 26787-78-0 | C <sub>16</sub> H <sub>19</sub> N <sub>3</sub> O <sub>5</sub> S              | 365.404          | 0.87               | 3.20            |
|              | Mezlocillin      | MEZ          | 51481-65-3 | C <sub>21</sub> H <sub>25</sub> N <sub>5</sub> O <sub>8</sub> S <sub>2</sub> | 539.582          | 1.18               | - <sup>c</sup>  |
|              | Ampicillin       | AMP          | 69-53-4    | C <sub>16</sub> H <sub>19</sub> N <sub>3</sub> O <sub>4</sub> S              | 349.405          | 1.65               | 2.50            |
|              | Cefuroxime       | CFO          | 55268-75-2 | C <sub>16</sub> H <sub>16</sub> N <sub>4</sub> O <sub>8</sub> S              | 424.385          | 0.47               | -               |
|              | Cefadroxil       | CFD          | 50370-12-2 | C <sub>16</sub> H <sub>17</sub> N <sub>3</sub> O <sub>5</sub> S              | 363.388          | 0.09               | -               |
|              | Ceftriaxone      | CER          | 73384-59-5 | C <sub>18</sub> H <sub>18</sub> N <sub>8</sub> O <sub>7</sub> S <sub>3</sub> | 554.580          | 0.77               | -               |
|              | Cefotaxim        | CTX          | 60846-21-1 | C <sub>16</sub> H <sub>17</sub> N <sub>5</sub> O <sub>7</sub> S <sub>2</sub> | 455.465          | 0.29               | -               |
|              | Cefazolin        | CFZ          | 25953-19-9 | C <sub>14</sub> H <sub>14</sub> N <sub>8</sub> O <sub>4</sub> S <sub>3</sub> | 454.507          | 1.13               | -               |
|              | Cefmetazole      | CFM          | 56796-20-4 | C <sub>15</sub> H <sub>17</sub> N <sub>7</sub> O <sub>5</sub> S <sub>3</sub> | 471.534          | 0.97               | -               |
| macrolides   | Erythromycin     | ERY          | 114-07-8   | C <sub>37</sub> H <sub>67</sub> NO <sub>13</sub>                             | 733.927          | 3.06               | 8.90            |
|              | Roxithromycin    | ROX          | 80214-83-1 | C <sub>41</sub> H <sub>76</sub> N <sub>2</sub> O <sub>15</sub>               | 837.047          | 3.73               | -               |
|              | Tylosin          | TYL          | 1401-69-0  | C <sub>46</sub> H <sub>77</sub> NO <sub>17</sub>                             | 916.100          | 1.63               | 7.73            |
|              | Azithromycin     | AZI          | 83905-01-5 | C <sub>38</sub> H <sub>72</sub> N <sub>2</sub> O <sub>12</sub>               | 748.984          | 4.02               | 8.74            |
|              | Spiramycin       | SPI          | 8025-81-8  | C <sub>43</sub> H <sub>74</sub> N <sub>2</sub> O <sub>14</sub>               | 843.053          | 1.87               | 7.88            |
|              | Josamycin        | JOS          | 16846-24-5 | C <sub>42</sub> H <sub>69</sub> NO <sub>15</sub>                             | 827.995          | 3.88               | -               |
|              | Clarithromycin   | CLR          | 81103-11-9 | C <sub>38</sub> H <sub>69</sub> NO <sub>13</sub>                             | 747.953          | 3.16               | 8.99            |
|              | Kitasamycin      | KIT          | 1392-21-8  | C <sub>40</sub> H <sub>67</sub> NO <sub>14</sub>                             | 785.958          | 3.35               | -               |
|              | Oleandomycin     | ODM          | 3922-90-5  | C <sub>35</sub> H <sub>61</sub> NO <sub>12</sub>                             | 687.858          | 1.69               | 8.84            |
|              | Leucomycin       | LCM          | 8025-81-8  | C <sub>43</sub> H <sub>74</sub> N <sub>2</sub> O <sub>14</sub>               | 843.053          | 1.87               | 7.88            |
| sulfonamides | Sulfanilamide    | SA           | 63-74-1    | C <sub>6</sub> H <sub>8</sub> N <sub>2</sub> O <sub>2</sub> S                | 172.205          | 0.62               | 10.58           |
|              | Sulfapyridine    | SP           | 144-83-2   | C <sub>11</sub> H <sub>11</sub> N <sub>3</sub> O <sub>2</sub> S              | 249.289          | 0.35               | 8.43            |
| sulfonamides | Sulfacetamide    | SAAM         | 144-80-9   | C <sub>8</sub> H <sub>10</sub> N <sub>2</sub> O <sub>3</sub> S               | 214.242          | 0.96               | -               |
|              | Sulfadimethoxine | SDM          | 122-11-2   | C <sub>12</sub> H <sub>14</sub> N <sub>4</sub> O <sub>4</sub> S              | 310.329          | 1.63               | -               |
|              | Sulfameter       | SM           | 651-06-9   | C <sub>11</sub> H <sub>12</sub> N <sub>4</sub> O <sub>3</sub> S              | 280.303          | 0.41               | -               |

| Class            | Compound               | Abbreviation | CAS NO.     | Molecular formula                                                            | Molecular weight | logK <sub>ow</sub> | pK <sub>a</sub> |
|------------------|------------------------|--------------|-------------|------------------------------------------------------------------------------|------------------|--------------------|-----------------|
| fluoroquinolones | Sulfamethazine         | SMZ          | 57-68-1     | C <sub>12</sub> H <sub>14</sub> N <sub>4</sub> O <sub>2</sub> S              | 278.330          | 0.14               | 2.65            |
|                  | Sulfaguanidine         | SGD          | 57-67-0     | C <sub>7</sub> H <sub>10</sub> N <sub>4</sub> O <sub>2</sub> S               | 214.245          | 1.22               | 11.25           |
|                  | Sulfamethoxazole       | SMX          | 723-46-6    | C <sub>10</sub> H <sub>11</sub> N <sub>3</sub> O <sub>3</sub> S              | 253.278          | 0.89               | 1.60            |
|                  | Sulfamerazin           | SMR          | 127-79-7    | C <sub>11</sub> H <sub>12</sub> N <sub>4</sub> O <sub>2</sub> S              | 264.304          | 0.14               | -               |
|                  | Sulfamonomethoxine     | SMM          | 1220-83-3   | C <sub>11</sub> H <sub>12</sub> N <sub>4</sub> O <sub>3</sub> S              | 280.303          | 0.70               | -               |
|                  | Sulfaquinoxaline       | SQ           | 59-40-5     | C <sub>14</sub> H <sub>12</sub> N <sub>4</sub> O <sub>2</sub> S              | 300.336          | 1.68               | 5.10            |
|                  | Sulfachloropyridazine  | SCP          | 80-32-0     | C <sub>10</sub> H <sub>9</sub> ClN <sub>4</sub> O <sub>2</sub> S             | 284.722          | 3.25               | -               |
|                  | Sulfadiazine           | SD           | 68-35-9     | C <sub>10</sub> H <sub>10</sub> N <sub>4</sub> O <sub>2</sub> S              | 250.277          | 0.09               | 6.36            |
|                  | Sulfathiazole          | STZ          | 72-14-0     | C <sub>9</sub> H <sub>9</sub> N <sub>3</sub> O <sub>2</sub> S <sub>2</sub>   | 255.317          | 0.05               | 2.20            |
|                  | Sulfisoxazole          | SIA          | 127-69-5    | C <sub>11</sub> H <sub>13</sub> N <sub>3</sub> O <sub>3</sub> S              | 267.304          | 1.01               | 1.50            |
|                  | Trimethoprim           | TMP          | 738-70-5    | C <sub>14</sub> H <sub>18</sub> N <sub>4</sub> O <sub>3</sub>                | 290.318          | 0.91               | 7.12            |
|                  | Sulfadoxine            | SDX          | 2447-57-6   | C <sub>12</sub> H <sub>14</sub> N <sub>4</sub> O <sub>4</sub> S              | 310.329          | 0.70               | -               |
|                  | Sulfamethoxypyridazine | SMP          | 80-35-3     | C <sub>11</sub> H <sub>12</sub> N <sub>4</sub> O <sub>3</sub> S              | 280.303          | 0.32               | 6.70            |
|                  | Sulfadimidine          | SM2          | 57-68-1     | C <sub>12</sub> H <sub>14</sub> N <sub>4</sub> O <sub>2</sub> S              | 278.330          | 0.89               | 7.59            |
|                  | Sulfamethizole         | SML          | 144-82-1    | C <sub>9</sub> H <sub>10</sub> N <sub>4</sub> O <sub>2</sub> S <sub>2</sub>  | 270.331          | 0.54               | -               |
|                  | Sulfisomidine          | SIM          | 515-64-0    | C <sub>12</sub> H <sub>14</sub> N <sub>4</sub> O <sub>2</sub> S              | 278.330          | 0.33               | -               |
|                  | Sulfamethiazole        | SMT          | 144-82-1    | C <sub>9</sub> H <sub>10</sub> N <sub>4</sub> O <sub>2</sub> S <sub>2</sub>  | 270.331          | 0.54               | -               |
|                  | Pipemidicacid          | PPA          | 51940-44-4  | C <sub>14</sub> H <sub>17</sub> N <sub>5</sub> O <sub>3</sub>                | 303.316          | 2.15               | -               |
|                  | Fleroxacin             | FLE          | 79660-72-3  | C <sub>17</sub> H <sub>18</sub> F <sub>3</sub> N <sub>3</sub> O <sub>3</sub> | 369.338          | 0.24               | -               |
|                  | Ciprofloxacin          | CIP          | 85721-33-1  | C <sub>17</sub> H <sub>18</sub> FN <sub>3</sub> O <sub>3</sub>               | 331.341          | 0.28               | 6.09            |
|                  | Gatifloxacin           | GAT          | 112811-59-3 | C <sub>19</sub> H <sub>22</sub> FN <sub>3</sub> O <sub>4</sub>               | 375.394          | 1.21               | -               |
|                  | Lomefloxacin           | LOM          | 98079-51-7  | C <sub>17</sub> H <sub>19</sub> F <sub>2</sub> N <sub>3</sub> O <sub>3</sub> | 351.348          | 0.30               | -               |
|                  | Moxifloxacin           | MXF          | 151096-09-2 | C <sub>21</sub> H <sub>24</sub> FN <sub>3</sub> O <sub>4</sub>               | 401.430          | 0.95               | -               |
|                  | Norfloxacin            | NOR          | 70458-96-7  | C <sub>16</sub> H <sub>18</sub> FN <sub>3</sub> O <sub>3</sub>               | 319.331          | 0.46               | 6.34            |
|                  | Ofloxacin              | OFL          | 82419-36-1  | C <sub>18</sub> H <sub>20</sub> FN <sub>3</sub> O <sub>4</sub>               | 361.367          | 0.39               | 5.97            |
| fluoroquinolones | Enrofloxacin           | ENR          | 93106-60-6  | C <sub>19</sub> H <sub>22</sub> FN <sub>3</sub> O <sub>3</sub>               | 359.395          | 0.70               | -               |
|                  | Difloxacin             | DIF          | 98106-17-3  | C <sub>21</sub> H <sub>19</sub> F <sub>2</sub> N <sub>3</sub> O <sub>3</sub> | 399.391          | 2.72               | -               |
|                  | Marbofloxacin          | MAR          | 115550-35-1 | C <sub>17</sub> H <sub>19</sub> FN <sub>4</sub> O <sub>4</sub>               | 362.356          | 0.55               | -               |
|                  | Nalidixicacid          | NDA          | 389-08-2    | C <sub>12</sub> H <sub>12</sub> N <sub>2</sub> O <sub>3</sub>                | 232.235          | 1.59               | 8.60            |

| Class            | Compound          | Abbreviation | CAS NO.     | Molecular formula                                                              | Molecular weight | logK <sub>ow</sub> | pK <sub>a</sub> |
|------------------|-------------------|--------------|-------------|--------------------------------------------------------------------------------|------------------|--------------------|-----------------|
|                  | Pefloxacin        | PEF          | 70458-92-3  | C <sub>17</sub> H <sub>20</sub> FN <sub>3</sub> O <sub>3</sub>                 | 333.357          | 0.27               | -               |
|                  | Sarafloxacin      | SRA          | 98105-99-8  | C <sub>20</sub> H <sub>17</sub> F <sub>2</sub> N <sub>3</sub> O <sub>3</sub>   | 385.364          | 1.07               | 5.60            |
|                  | Danofloxacin      | DAN          | 112398-08-0 | C <sub>19</sub> H <sub>20</sub> FN <sub>3</sub> O <sub>3</sub>                 | 357.379          | 1.20               | -               |
|                  | Flumequine        | FMQ          | 42835-25-6  | C <sub>14</sub> H <sub>12</sub> FNO <sub>3</sub>                               | 261.248          | 1.60               | -               |
|                  | Sparfloxacin      | SPA          | 110871-86-8 | C <sub>19</sub> H <sub>22</sub> F <sub>2</sub> N <sub>4</sub> O <sub>3</sub>   | 392.400          | 1.60               | -               |
|                  | Enoxacin          | ENO          | 74011-58-8  | C <sub>15</sub> H <sub>17</sub> FN <sub>4</sub> O <sub>3</sub>                 | 320.319          | 0.20               | -               |
|                  | Oxolinicacid      | OLA          | 14698-29-4  | C <sub>13</sub> H <sub>11</sub> NO <sub>5</sub>                                | 261.230          | 0.94               | 6.87            |
|                  | Orbifloxacin      | ORB          | 113617-63-3 | C <sub>19</sub> H <sub>20</sub> F <sub>3</sub> N <sub>3</sub> O <sub>3</sub>   | 395.380          | 2.37               | -               |
|                  | Pyrroleacid       | PA           | 89059-06-3  | C <sub>7</sub> H <sub>9</sub> NO <sub>2</sub>                                  | 139.152          | 0.96               | -               |
|                  | Flumequin         | FLU          | 42835-25-6  | C <sub>14</sub> H <sub>12</sub> FNO <sub>3</sub>                               | 261.248          | 1.60               | -               |
| lincosamides     | Lincomycin        | LIN          | 154-21-2    | C <sub>18</sub> H <sub>35</sub> ClN <sub>2</sub> O <sub>6</sub> S              | 442.998          | 0.20               | 7.60            |
| chloramphenicols | Florfenicol       | FF           | 73231-34-2  | C <sub>12</sub> H <sub>14</sub> Cl <sub>2</sub> FNO <sub>4</sub> S             | 358.213          | 0.12               | -               |
|                  | Chloramphenicol   | CAP          | 56-75-7     | C <sub>11</sub> H <sub>12</sub> Cl <sub>2</sub> N <sub>2</sub> O <sub>5</sub>  | 323.129          | 1.14               | -               |
|                  | Thiamphenicol     | TAP          | 15318-45-3  | C <sub>12</sub> H <sub>15</sub> C <sub>12</sub> NO <sub>5</sub> S              | 356.222          | 0.33               | -               |
| imidazole        | Metronidazole     | MET          | 443-48-1    | C <sub>6</sub> H <sub>9</sub> N <sub>3</sub> O <sub>3</sub>                    | 171.154          | 0.02               | -               |
| tetracyclines    | Chlortetracycline | CTC          | 57-62-5     | C <sub>22</sub> H <sub>23</sub> ClN <sub>2</sub> O <sub>8</sub>                | 478.880          | 0.62               | 3.30            |
|                  | Doxycycline       | DOX          | 564-25-0    | C <sub>22</sub> H <sub>24</sub> N <sub>2</sub> O <sub>8</sub>                  | 444.435          | 1.36               | -               |
|                  | Tetracycline      | TET          | 60-54-8     | C <sub>22</sub> H <sub>24</sub> N <sub>2</sub> O <sub>8</sub>                  | 444.435          | 1.37               | 3.30            |
|                  | Oxytetracycline   | OTC          | 79-57-2     | C <sub>22</sub> H <sub>24</sub> N <sub>2</sub> O <sub>9</sub>                  | 460.434          | 0.90               | 9.50            |
| glycopeptides    | Vancomycin        | VAN          | 1404-90-6   | C <sub>66</sub> H <sub>75</sub> Cl <sub>2</sub> N <sub>9</sub> O <sub>24</sub> | 1449.250         | 4.73               | 2.60            |

<sup>a</sup> Values in black obtained from Chemical search engine in Chinese: <https://www.chemsrc.com/>.

<sup>b</sup> Values in red obtained from U.S. National Library of Medicine: <http://toxnet.nlm.nih.gov/>.

<sup>c</sup> Not available.

Table S2 abbreviation and full name index

| Abbreviation     | Full Name                                      | Abbreviation     | Full Name                            |
|------------------|------------------------------------------------|------------------|--------------------------------------|
| AF               | Appropriate Standard Assessment Factor of 1000 | ENR              | Enrofloxacin                         |
| AMOX             | Amoxicillin                                    | ERY              | Erythromycin                         |
| AMP              | Ampicillin                                     | FF               | Florfenicol                          |
| AZI              | Azithromycin                                   | FLE              | Fleroxacin                           |
| BS               | Bohai Sea                                      | FLU              | Flumequin                            |
| CAP              | Chloramphenicol                                | FMQ              | Flumequine                           |
| CC               | Central China                                  | GAT              | Gatifloxacin                         |
| CER              | Ceftriaxone                                    | JOS              | Josamycin                            |
| CFD              | Cefadroxil                                     | KIT              | Kitasamycin                          |
| CFM              | Cefmetazole                                    | LC <sub>50</sub> | Lethal Concentration 50              |
| CFO              | Cefuroxime                                     | LCM              | Leucomycin                           |
| CFZ              | Cefazolin                                      | LIN              | Lincomycin                           |
| CIP              | Ciprofloxacin                                  | LOM              | Lomefloxacin                         |
| CLR              | Clarithromycin                                 | MAR              | Marbofloxacin                        |
| CLX              | Cephalexin                                     | MCs              | Macrolides                           |
| COVID-19         | Corona Virus Disease 2019                      | MDL              | Method Detection Level               |
| CPs              | Chloramphenicols                               | MEC              | Measured Environmental Concentration |
| CRD              | Cefradine                                      | MET              | Metronidazole                        |
| CTC              | Chlortetracycline                              | MEZ              | Mezlocillin                          |
| CTX              | Cefotaxim                                      | MXF              | Moxifloxacin                         |
| DAN              | Danofloxacin                                   | NC               | Northern China                       |
| DIF              | Difloxacin                                     | NDA              | Nalidixicacid                        |
| DOX              | Doxycycline                                    | NEC              | Northeastern China                   |
| EC               | Eastern China                                  | NOEC             | No Observed Effect Concentration     |
| EC <sub>50</sub> | Concentration for 50% of Maximal Effect        | NOR              | Norfloxacin                          |
| ENO              | Enoxacin                                       | NWC              | Northwestern China                   |

| Abbreviation | Full Name                                 | Abbreviation | Full Name                   |
|--------------|-------------------------------------------|--------------|-----------------------------|
| ODM          | Oleandomycin                              | SIM          | Sulfisomidine               |
| OFL          | Ofloxacin                                 | SM           | Sulfameter                  |
| OLA          | Oxolinicacid                              | SM2          | Sulfadimidine               |
| ORB          | Orbifloxacin                              | SML          | Sulfamethizole              |
| OTC          | Oxytetracycline                           | SMM          | Sulfamonomethoxine          |
| PA           | Pyrroleacid                               | SMP          | Sulfamethoxypyridazine      |
| PEF          | Pefloxacin                                | SMR          | Sulfamerazin                |
| PENV         | Penicillin V                              | SMT          | Sulfamethiazole             |
| PENG         | Penicillin G                              | SMX          | Sulfamethoxazole            |
| PNEC         | Predicted No Effect Concentration         | SMZ          | Sulfamethazine              |
| PPA          | Pipemidicacid                             | SP           | Sulfapyridine               |
| PPCPs        | Pharmaceutical and Personal Care Products | SPA          | Sparfloxacin                |
| PRB          | Pearl River Basin                         | SPI          | Spiramycin                  |
| QNs          | Fluoroquinolones                          | SQ           | Sulfaquinoxaline            |
| ROX          | Roxithromycin                             | SRA          | Sarafloxacin                |
| RQs          | Risk Quotients                            | STZ          | Sulfathiazole               |
| SA           | Sulfanilamide                             | SWC          | Southwestern China          |
| SAAM         | Sulfacetamide                             | TAP          | Thiamphenicol               |
| SAs          | Sulfonamides                              | TCs          | Tetracyclines               |
| SC           | Southern China                            | TET          | Tetracycline                |
| SCP          | Sulfachloropyridazine                     | TMP          | Trimethoprim                |
| SD           | Sulfadiazine                              | TYL          | Tylosin                     |
| SDM          | Sulfadimethoxine                          | VAN          | Vancomycin                  |
| SDX          | Sulfadoxine                               | WWTPs        | Wastewater Treatment Plants |
| SGD          | Sulfaguanidine                            | YS           | Yellow Sea                  |
| SIA          | Sulfisoxazole                             | YRB          | Yangtze River Basin         |

Table S3 Risk quotients of antibiotics in seawater of China

| year                                   | 2008               | 2009               | 2010               | 2011    | 2012     | 2013    | 2014    | 2015     | 2016    | 2017     |
|----------------------------------------|--------------------|--------------------|--------------------|---------|----------|---------|---------|----------|---------|----------|
|                                        | RQ                 | RQ                 | RQ                 | RQ      | RQ       | RQ      | RQ      | RQ       | RQ      | RQ       |
|                                        | (MEC)              | (MEC)              | (MEC)              | (MEC)   | (MEC)    | (MEC)   | (MEC)   | (MEC)    | (MEC)   | (MEC)    |
| ROX<br>PNEC=47<br>ng·L <sup>-1</sup>   | 0.640 <sup>a</sup> | 0.424              | 0.001              |         |          |         | 0.053   |          |         | 3.841    |
|                                        | (30.07)            | (19.95)            | (0.06)             |         |          |         | (2.50)  |          |         | (180.53) |
|                                        |                    |                    | 0.029 <sup>b</sup> |         | 1.495    |         |         | 0.191    |         |          |
|                                        |                    |                    | (1.38)             |         | (70.27)  |         |         | (8.96)   |         |          |
|                                        |                    | 0.056 <sup>c</sup> |                    | 0.018   | 0.020    | 0.258   | 0.007   |          | 0.209   |          |
|                                        |                    | (2.65)             |                    | (0.83)  | (0.95)   | (12.11) | (0.32)  |          | (9.80)  |          |
|                                        | 0.119 <sup>d</sup> | 0.060              | 0.191              | 0.046   |          |         |         | 0.018    | 0.199   |          |
|                                        | (5.60)             | (2.82)             | (8.97)             | (2.16)  |          |         |         | (0.83)   | (9.34)  |          |
| SMX<br>PNEC=1540<br>ng·L <sup>-1</sup> | 0.015              | 0.085              | 0.001              |         |          |         |         |          | 0.004   | 0.081    |
|                                        | (23.69)            | (131.63)           | (1.72)             |         |          |         |         |          | (6.67)  | (124.33) |
|                                        |                    |                    | 0.009              | 0.001   |          | 0.014   |         | 0.115    |         |          |
|                                        |                    |                    | (14.490)           | (1.28)  |          | (22.00) |         | (177.52) |         |          |
|                                        |                    | 0.020              | 0.175              | 0.008   | 0.070    | 0.011   | 0.010   | 0.014    | 0.001   |          |
|                                        |                    | (30.22)            | (270)              | (12.18) | (108.47) | (17.16) | (15.08) | (20.91)  | (1.45)  |          |
|                                        | 0.000              | 0.009              | 0.002              | 0.010   |          |         |         | 0.002    | 0.017   |          |
|                                        | (0.51)             | (14.06)            | (3.55)             | (15.89) |          |         |         | (3.50)   | (26.30) |          |
| SMZ<br>PNEC=1740<br>ng·L <sup>-1</sup> | 0.005              | 0.010              |                    |         |          |         |         |          | 0.002   | 0.028    |
|                                        | (8.96)             | (16.64)            |                    |         |          |         |         |          | (3.84)  | (48.60)  |
|                                        |                    |                    |                    | 0.000   |          | 0.015   |         | 0.002    |         |          |
|                                        |                    |                    |                    | (0.34)  |          | (25.50) |         | (3.97)   |         |          |
|                                        |                    | 0.083              |                    | 0.009   |          | 0.001   | 0.002   | 0.002    | 0.004   |          |
|                                        |                    | (144.13)           |                    | (15.3)  |          | (1.52)  | (3.55)  | (4.22)   | (6.95)  |          |
|                                        | 0.000              | 0.013              |                    | 0.007   |          |         |         | 0.004    | 0.008   |          |
|                                        | (0.04)             | (23.3)             |                    | (12.86) |          |         |         | (6.15)   | (14.5)  |          |

| year                                    | 2008     | 2009     | 2010    | 2011    | 2012    | 2013    | 2014    | 2015    | 2016     | 2017     |
|-----------------------------------------|----------|----------|---------|---------|---------|---------|---------|---------|----------|----------|
|                                         | RQ       | RQ       | RQ      | RQ      | RQ      | RQ      | RQ      | RQ      | RQ       | RQ       |
|                                         | (MEC)    | (MEC)    | (MEC)   | (MEC)   | (MEC)   | (MEC)   | (MEC)   | (MEC)   | (MEC)    | (MEC)    |
| SD<br>PNEC=2220<br>ng·L <sup>-1</sup>   | 0.005    | 0.012    | 0.000   |         |         |         |         |         | 0.002    | 0.023    |
|                                         | (10.19)  | (25.95)  | (0.05)  |         |         |         |         |         | (4.39)   | (51.00)  |
|                                         |          |          | 0.000   | 0.000   |         | 0.037   |         | 0.032   |          |          |
|                                         |          |          | (0.75)  | (0.19)  |         | (82.90) |         | (71.40) |          |          |
|                                         |          | 0.006    |         | 0.005   | 0.016   | 0.002   | 0.006   | 0.001   |          |          |
|                                         |          | (12.84)  |         | (10.92) | (35.9)  | (4.85)  | (14.25) | (1.71)  |          |          |
|                                         | 0.000    | 0.001    | 0.004   | 0.001   |         |         |         | 0.001   | 0.000    |          |
|                                         | (0.12)   | (2.63)   | (7.83)  | (2.66)  |         |         |         | (1.23)  | (0.01)   |          |
| TMP<br>PNEC=16400<br>ng·L <sup>-1</sup> | 0.001    | 0.056    | 0.000   |         |         |         |         |         |          | 0.004    |
|                                         | (12.33)  | (924.79) | (2.93)  |         |         |         |         |         |          | (64.33)  |
|                                         |          |          | 0.000   |         |         |         |         | 0.000   |          |          |
|                                         |          |          | (2.97)  |         |         |         |         | (7.20)  |          |          |
|                                         |          | 0.001    |         | 0.001   |         | 0.000   | 0.000   | 0.000   | 0.000    |          |
|                                         |          | (10.9)   |         | (10.24) |         | (3.83)  | (0.37)  | (6.85)  | (0.15)   |          |
|                                         | 0.005    | 0.001    | 0.000   | 0.000   |         |         |         | 0.000   | 0.000    |          |
|                                         | (76.6)   | (13.13)  | (1.08)  | (5.96)  |         |         |         | (3.68)  | (6.52)   |          |
| NOR<br>PNEC=108.3<br>ng·L <sup>-1</sup> | 2.461    | 0.707    |         |         |         |         | 0.363   |         |          | 1.396    |
|                                         | (255.40) | (73.36)  |         |         |         |         | (37.73) |         |          | (144.87) |
|                                         |          |          | 0.248   |         | 0.714   |         |         | 0.176   |          |          |
|                                         |          |          | (25.72) |         | (74.15) |         |         | (18.25) |          |          |
|                                         |          | 0.015    | 0.723   | 0.002   | 0.010   | 0.115   | 0.312   |         |          |          |
|                                         |          | (1.54)   | (75)    | (0.23)  | (1.02)  | (11.95) | (32.39) |         |          |          |
|                                         | 0.001    | 0.086    | 0.096   | 0.661   |         |         |         | 0.007   | 1.204    |          |
|                                         | (0.06)   | (8.94)   | (10.01) | (68.61) |         |         |         | (0.69)  | (125.00) |          |
|                                         | 18.517   | 1.144    |         |         |         |         | 0.604   |         | 0.506    | 20.265   |





| year                                   | 2008             | 2009             | 2010            | 2011             | 2012             | 2013             | 2014             | 2015             | 2016             | 2017             |
|----------------------------------------|------------------|------------------|-----------------|------------------|------------------|------------------|------------------|------------------|------------------|------------------|
|                                        | RQ               | RQ               | RQ              | RQ               | RQ               | RQ               | RQ               | RQ               | RQ               | RQ               |
|                                        | (MEC)            | (MEC)            | (MEC)           | (MEC)            | (MEC)            | (MEC)            | (MEC)            | (MEC)            | (MEC)            | (MEC)            |
| DOX<br>PNEC=316<br>ng·L <sup>-1</sup>  |                  |                  | 0.003<br>(1.00) | 0.001<br>(0.26)  |                  | 0.031<br>(9.70)  |                  |                  |                  |                  |
|                                        |                  | 0.021<br>(6.64)  |                 | 0.252<br>(79.75) | 0.036<br>(11.30) |                  |                  |                  |                  |                  |
|                                        |                  |                  |                 |                  |                  |                  |                  |                  |                  |                  |
| TET<br>PNEC=3310<br>ng·L <sup>-1</sup> | 0.001<br>(3.80)  | 0.009<br>(30.89) |                 |                  |                  |                  | 0.007<br>(23.55) |                  | 0.002<br>(6.22)  | 0.005<br>(16.53) |
|                                        |                  |                  | 0.000<br>(1.28) | 0.000<br>(1.03)  |                  | 0.003<br>(9.30)  |                  | 0.001<br>(3.60)  |                  |                  |
|                                        |                  | 0.005<br>(15.97) |                 | 0.006<br>(19.22) | 0.001<br>(1.69)  |                  | 0.004<br>(11.61) |                  |                  |                  |
|                                        |                  |                  | 0.001<br>(3.60) | 0.001<br>(3.60)  |                  |                  |                  | 0.001<br>(3.60)  | 0.001<br>(3.60)  |                  |
|                                        |                  |                  |                 |                  |                  |                  |                  |                  |                  |                  |
| OTC<br>PNEC=1040<br>ng·L <sup>-1</sup> | 0.014<br>(14.11) | 0.026<br>(27.09) |                 |                  |                  | 0.018<br>(18.53) |                  |                  | 0.020<br>(20.93) | 0.062<br>(64.23) |
|                                        |                  |                  | 0.003<br>(3.16) | 0.002<br>(2.46)  |                  | 0.022<br>(22.60) |                  | 0.023<br>(24.31) |                  |                  |
|                                        |                  | 0.016<br>(16.19) |                 | 0.037<br>(38.88) | 0.027<br>(27.84) |                  | 0.018<br>(18.27) |                  |                  |                  |
|                                        |                  |                  | 0.006<br>(6.56) |                  |                  |                  |                  | 0.001<br>(1.44)  | 0.034<br>(35.10) |                  |
|                                        |                  |                  |                 |                  |                  |                  |                  |                  |                  |                  |

RQs and (MEC) in the seawater in <sup>a</sup> the Bohai Sea; <sup>b</sup> the Yellow Sea; <sup>c</sup> the Yangtze River Basin and <sup>d</sup> the Pearl River Basin.

Table S4 Risk quotients of antibiotics in surface water of China

| year                                   | 2008               | 2009     | 2010               | 2011               | 2012      | 2013     | 2014    | 2015    | 2016     | 2017    |
|----------------------------------------|--------------------|----------|--------------------|--------------------|-----------|----------|---------|---------|----------|---------|
|                                        | RQ                 | RQ       | RQ                 | RQ                 | RQ        | RQ       | RQ      | RQ      | RQ       | RQ      |
|                                        | (MEC)              | (MEC)    | (MEC)              | (MEC)              | (MEC)     | (MEC)    | (MEC)   | (MEC)   | (MEC)    | (MEC)   |
| ROX<br>PNEC=47<br>ng·L <sup>-1</sup>   | 0.247 <sup>a</sup> |          | 0.313              | 0.060              |           |          |         |         |          |         |
|                                        | (11.61)            |          | (14.70)            | (2.81)             |           |          |         |         |          |         |
|                                        |                    |          | 0.001 <sup>b</sup> |                    | 0.101     | 0.102    | 0.728   | 0.127   | 0.045    | 0.014   |
|                                        |                    |          | (0.05)             |                    | (4.74)    | (4.83)   | (3.71)  | (5.96)  | (2.10)   | (0.67)  |
|                                        | 0.597 <sup>c</sup> | 8.387    | 0.065              | 0.058              |           |          |         | 0.029   | 0.035    |         |
|                                        | (28.07)            | (394.20) | (3.06)             | (2.74)             |           |          |         | (1.38)  | (1.66)   |         |
|                                        |                    |          |                    | 0.102 <sup>d</sup> |           |          | 0.728   |         |          |         |
|                                        |                    |          |                    | (4.79)             |           |          | (34.22) |         |          |         |
| SMX<br>PNEC=1540<br>ng·L <sup>-1</sup> | 0.037              |          | 0.078              | 0.002              |           | 0.029    |         |         |          | 0.014   |
|                                        | (56.74)            |          | (1200.77)          | (3.68)             |           | (45.00)  |         |         |          | (21.59) |
|                                        | 0.039              | 0.021    | 0.002              | 0.001              | 0.006     | 0.010    | 0.002   | 0.015   | 0.002    | 0.004   |
|                                        | (60.00)            | (31.7)   | (3.67)             | (1.15)             | (9.02)    | (16.11)  | (2.85)  | (22.69) | (3.68)   | (5.96)  |
|                                        | 0.015              | 0.033    | 0.013              |                    | 0.006     | 0.012    | 0.001   | 0.001   | 0.007    |         |
|                                        | (22.69)            | (50.09)  | (20.74)            |                    | (8.85)    | (18.25)  | (1.2)   | (2.17)  | (10.39)  |         |
|                                        |                    |          |                    | 0.001              |           |          | 0.010   | 0.036   | 0.066    |         |
|                                        |                    |          |                    | (1.55)             |           |          | (15.21) | (56.03) | (101.28) |         |
| SMZ<br>PNEC=1740<br>ng·L <sup>-1</sup> | 0.003              |          | 0.002              | 0.001              |           | 0.146    |         |         |          | 0.015   |
|                                        | (5.70)             |          | (3.33)             | (1.61)             |           | (253.84) |         |         |          | (26.44) |
|                                        |                    | 0.015    | 0.098              | 0.003              | 1.191     | 0.001    | 0.000   | 0.001   | 0.001    | 0.001   |
|                                        |                    | (25.64)  | (170.86)           | (5.53)             | (2072.22) | (1.10)   | (0.05)  | (1.35)  | (0.92)   | (2.35)  |
|                                        | 0.006              | 0.174    | 0.047              |                    | 0.061     | 0.004    | 0.001   |         | 0.017    |         |
|                                        | (11.15)            | (301.93) | (82.40)            |                    | (105.30)  | (6.30)   | (2.03)  |         | (29.56)  |         |
|                                        |                    |          |                    | 0.004              |           | 0.002    | 0.003   | 0.002   | 0.000    |         |
|                                        |                    |          |                    | (7.68)             |           | (4.15)   | (5.49)  | (3.63)  | (0.67)   |         |

| year                                    | 2008    | 2009     | 2010     | 2011    | 2012    | 2013     | 2014    | 2015     | 2016     | 2017    |
|-----------------------------------------|---------|----------|----------|---------|---------|----------|---------|----------|----------|---------|
|                                         | RQ      | RQ       | RQ       | RQ      | RQ      | RQ       | RQ      | RQ       | RQ       | RQ      |
|                                         | (MEC)   | (MEC)    | (MEC)    | (MEC)   | (MEC)   | (MEC)    | (MEC)   | (MEC)    | (MEC)    | (MEC)   |
| SD<br>PNEC=2220<br>ng·L <sup>-1</sup>   | 0.008   |          | 0.027    | 0.002   |         | 0.044    |         |          |          | 0.004   |
|                                         | (18.55) |          | (60.79)  | (4.04)  |         | (97.31)  |         |          |          | (8.79)  |
|                                         |         | 0.006    |          | 0.001   | 0.041   | 0.000    | 0.001   | 0.003    | 0.006    | 0.000   |
|                                         |         | (13.34)  |          | (2.34)  | (90.31) | (1.10)   | (2.28)  | (5.55)   | (14.26)  | (0.08)  |
|                                         | 0.002   | 0.089    | 0.024    | 0.012   | 0.002   |          | 0.001   | 0.049    |          |         |
|                                         | (4.57)  | (196.94) | (52.57)  | (26.86) | (3.91)  |          | (2.50)  | (109.86) |          |         |
|                                         |         |          |          | 0.002   |         | 0.001    | 0.007   | 0.068    | 0.048    |         |
|                                         |         |          |          | (4.51)  |         | (2.05)   | (14.86) | (150.86) | (106.67) |         |
| TMP<br>PNEC=16400<br>ng·L <sup>-1</sup> | 0.001   |          |          |         |         | 0.051    |         |          |          | 0.001   |
|                                         | (17.71) |          |          |         |         | (834.60) |         |          |          | (20.48) |
|                                         |         |          | 0.004    |         | 0.000   | 0.018    |         | 0.001    | 0.000    | 0.000   |
|                                         |         |          | (60.78)  |         | (2.84)  | (287.00) |         | (8.45)   | (0.39)   | (0.65)  |
|                                         | 0.002   |          | 0.000    | 0.001   |         |          |         | 0.000    |          |         |
|                                         | (32.79) |          | (4.74)   | (8.35)  |         |          |         | (6.53)   |          |         |
|                                         |         |          |          | 0.000   |         |          | 0.000   | 0.000    | 0.000    |         |
|                                         |         |          |          | (3.99)  |         |          | (4.73)  | (0.76)   | (0.39)   |         |
| NOR<br>PNEC=108.3<br>ng·L <sup>-1</sup> | 0.503   | 0.300    | 0.276    | 0.077   |         | 0.491    |         |          |          |         |
|                                         | (52.25) | (31.17)  | (28.60)  | (8.00)  |         | (51.43)  |         |          |          |         |
|                                         |         | 0.096    | 4.540    | 0.119   | 0.065   | 0.470    | 0.007   | 0.043    |          | 0.011   |
|                                         |         | (9.95)   | (471.29) | (12.33) | (6.74)  | (48.77)  | (0.76)  | (0.44)   |          | (1.12)  |
|                                         | 0.132   | 0.413    | 0.032    |         | 0.123   | 0.257    |         | 0.077    |          |         |
|                                         | (13.66) | (42.82)  | (3.35)   |         | (12.80) | (26.68)  |         | (8.02)   |          |         |
|                                         |         |          |          | 0.024   |         |          | 0.355   | 0.003    | 0.001    |         |
|                                         |         |          |          | (2.54)  |         |          | (36.88) | (0.36)   | (0.15)   |         |
|                                         | 6.327   | 0.365    | 0.817    | 2.478   |         | 88.355   |         |          |          | 2.473   |

| year                                   | 2008<br>RQ<br>(MEC) | 2009<br>RQ<br>(MEC) | 2010<br>RQ<br>(MEC) | 2011<br>RQ<br>(MEC) | 2012<br>RQ<br>(MEC) | 2013<br>RQ<br>(MEC) | 2014<br>RQ<br>(MEC) | 2015<br>RQ<br>(MEC) | 2016<br>RQ<br>(MEC) | 2017<br>RQ<br>(MEC) |
|----------------------------------------|---------------------|---------------------|---------------------|---------------------|---------------------|---------------------|---------------------|---------------------|---------------------|---------------------|
| OFL<br>PNEC=11.3<br>ng·L <sup>-1</sup> | (71.49)             | (4.13)              | (9.23)              | (28.00)             |                     | (998.41)            |                     |                     |                     | (27.94)             |
|                                        |                     | 0.424<br>(4.79)     | 37.659<br>(425.55)  | 1.770<br>(20.00)    | 3.364<br>(38.01)    | 6.486<br>(73.29)    | 0.050<br>(0.57)     | 0.141<br>(1.59)     | 0.050<br>(0.56)     | 0.027<br>(0.31)     |
|                                        | 8.489<br>(95.93)    |                     | 5.167<br>(58.39)    |                     | 0.996<br>(11.26)    |                     | 0.101<br>(1.14)     | 0.276<br>(3.12)     | 0.727<br>(8.21)     |                     |
|                                        |                     |                     |                     | 0.440<br>(4.97)     |                     |                     | 0.756<br>(8.54)     | 3.256<br>(36.79)    | 3.415<br>(38.59)    |                     |
|                                        | 0.161<br>(7.89)     |                     | 0.026<br>(1.28)     | 0.122<br>(6.00)     |                     | 1.140<br>(55.85)    |                     |                     |                     |                     |
| ENR<br>PNEC=49<br>ng·L <sup>-1</sup>   |                     | 0.101<br>(4.93)     |                     | 2.218<br>(108.670)  | 0.578<br>(28.30)    | 2.380<br>(116.63)   | 0.065<br>(3.18)     | 0.118<br>(5.80)     |                     |                     |
|                                        |                     |                     | 0.027<br>(1.32)     |                     | 0.204<br>(10.01)    | 0.371<br>(18.18)    |                     | 0.037<br>(1.80)     |                     |                     |
|                                        |                     |                     |                     | 0.330<br>(16.19)    |                     |                     | 0.260<br>(12.72)    | 0.009<br>(0.43)     | 0.018<br>(0.89)     |                     |
|                                        |                     |                     | 0.001<br>(7.95)     | 0.000<br>(2.36)     |                     | 0.004<br>(34.90)    |                     |                     |                     | 0.001<br>(4.87)     |
| CTC<br>PNEC=9310<br>ng·L <sup>-1</sup> |                     | 0.019<br>(172.50)   |                     | 0.010<br>(97.52)    | 0.043<br>(397.83)   | 0.036<br>(337.15)   | 0.000<br>(1.92)     | 0.003<br>(28.10)    |                     | 0.000<br>(2.60)     |
|                                        |                     |                     | 0.006<br>(56.49)    |                     | 0.004<br>(39.02)    | 0.002<br>(22.85)    |                     | 0.002<br>(16.16)    |                     |                     |
|                                        |                     |                     |                     | 0.004<br>(33.90)    |                     |                     | 0.007<br>(66.63)    | 0.059<br>(553.18)   | 0.012<br>(114.44)   |                     |
|                                        |                     |                     | 0.012<br>(3.82)     | 0.004<br>(1.41)     |                     |                     |                     |                     |                     | 0.033<br>(10.43)    |

| year                                   | 2008<br>RQ<br>(MEC) | 2009<br>RQ<br>(MEC) | 2010<br>RQ<br>(MEC) | 2011<br>RQ<br>(MEC) | 2012<br>RQ<br>(MEC) | 2013<br>RQ<br>(MEC) | 2014<br>RQ<br>(MEC) | 2015<br>RQ<br>(MEC) | 2016<br>RQ<br>(MEC) | 2017<br>RQ<br>(MEC) |
|----------------------------------------|---------------------|---------------------|---------------------|---------------------|---------------------|---------------------|---------------------|---------------------|---------------------|---------------------|
| DOX<br>PNEC=316<br>ng·L <sup>-1</sup>  |                     | 0.079<br>(25.00)    |                     |                     | 0.378<br>(119.56)   | 0.004<br>(1.20)     | 0.010<br>(3.03)     | 0.027<br>(8.59)     |                     | 0.001<br>(0.21)     |
|                                        |                     |                     | 0.021<br>(6.63)     |                     |                     | 0.147<br>(46.35)    | 0.085<br>(27.00)    |                     | 0.016<br>(5.11)     |                     |
|                                        |                     |                     |                     | 0.046<br>(14.57)    |                     |                     | 0.010<br>(3.16)     | 0.007<br>(2.20)     |                     |                     |
|                                        |                     | 0.003<br>(10.02)    | 0.008<br>(26.52)    | 0.002<br>(4.97)     | 0.001<br>(2.99)     | 0.013<br>(43.17)    |                     |                     |                     | 0.006<br>(20.84)    |
| TET<br>PNEC=3310<br>ng·L <sup>-1</sup> |                     | 0.002<br>(8.00)     | 0.154<br>(510.00)   |                     | 0.004<br>(13.87)    | 0.080<br>(265.39)   | 0.072<br>(237.80)   | 0.000<br>(0.72)     | 0.005<br>(17.90)    | 0.000<br>(1.07)     |
|                                        |                     | 0.011<br>(37.18)    |                     | 0.054<br>(177.94)   |                     | 0.014<br>(47.09)    |                     | 0.004<br>(13.71)    | 0.006<br>(18.47)    |                     |
|                                        |                     |                     |                     | 0.001<br>(4.89)     |                     |                     | 0.009<br>(29.56)    | 0.093<br>(308.07)   | 0.137<br>(453.58)   |                     |
|                                        |                     | 0.035<br>(36.30)    | 0.024<br>(25.23)    | 0.006<br>(6.16)     | 0.002<br>(1.63)     | 0.107<br>(111.49)   |                     |                     |                     | 0.022<br>(22.55)    |
| OTC<br>PNEC=1040<br>ng·L <sup>-1</sup> |                     |                     | 0.118<br>(122.50)   |                     | 0.113<br>(117.97)   | 0.566<br>(588.70)   | 1.087<br>(1130.45)  | 0.003<br>(2.94)     | 0.011<br>(10.97)    | 0.004<br>(4.41)     |
|                                        |                     | 0.004<br>(4.34)     |                     | 0.028<br>(29.36)    |                     | 0.008<br>(8.69)     | 0.040<br>(41.48)    | 0.004<br>(4.42)     |                     |                     |
|                                        |                     |                     |                     | 0.003<br>(3.06)     |                     |                     | 0.012<br>(12.14)    | 0.425<br>(442.10)   | 0.152<br>(158.00)   |                     |
|                                        |                     |                     |                     |                     |                     |                     |                     |                     |                     |                     |

RQs and (MEC) in the surface water in <sup>a</sup> Northern China; <sup>b</sup> Eastern China; <sup>c</sup> Southern China and <sup>d</sup> Central China
